# Supplementary material
Source: MDPI journal article supplement (https://www.mdpi.com/2073-4395/14/3/489)
Supplement: s1 [file s1]

**Supplementary Table S1** The names and disease index categories of all 169 soybean germplasms.

| No. | Variety            | Resistance | No. | Variety           | Resistance |
|-----|--------------------|------------|-----|-------------------|------------|
| 1   | Hefeng47           | MR         | 86  | Huajiang4         | S          |
| 2   | ЗЛОТОВЛАСКА        | R          | 87  | Kenfeng16         | S          |
| 3   | T219H              | R          | 88  | Kenfeng22         | S          |
| 4   | Yongjiizaodou      | MR         | 89  | Hefeng50          | S          |
| 5   | NO10               | R          | 90  | Hefeng55          | S          |
| 6   | Suinong43          | MR         | 91  | Dongnong50        | S          |
| 7   | Heihe33            | HR         | 92  | Jiusan14-70       | S          |
| 8   | Heinong56          | MR         | 93  | Dongnong42        | S          |
| 9   | Jiyu94             | HR         | 94  | Heihe34           | S          |
| 10  | Suinong26          | HS         | 95  | Heihe28           | S          |
| 11  | Beijiao9206        | HS         | 96  | Liao small seed2  | S          |
| 12  | Xiaobaidou         | HS         | 97  | Longpin13-369     | S          |
| 13  | Daan kidney shaped | HS         | 98  | Jiyu105           | S          |
| 14  | Jiangmodou1        | HS         | 99  | Jiyu108           | S          |
| 15  | Longpin12-328      | HS         | 100 | Jilin small seed7 | S          |
| 16  | Ha14-2146          | HS         | 101 | Ha13-2413         | S          |
| 17  | Jizaohuang         | HS         | 102 | Ha13-2958         | S          |
| 18  | Silihuang          | HS         | 103 | Ha14-2028         | S          |
| 19  | Kenfeng18          | HS         | 104 | Changnong20       | S          |
| 20  | Suinong15          | HS         | 105 | Ha13-2187         | S          |
| 21  | HE14               | HS         | 106 | Ha12-4891         | S          |
| 22  | Hai6055            | HS         | 107 | Toyomosome        | S          |
| 23  | Nattosan           | S          | 108 | Jiyu72            | S          |
| 24  | Gongye03-5570      | S          | 109 | Hejiao02-69       | S          |
| 25  | L65-540            | S          | 110 | Magnolid(US)      | S          |
| 26  | L73-79             | S          | 111 | Zhonghuang35      | S          |
| 27  | L65-34             | S          | 112 | Zhonghuang10      | S          |
| 28  | L72D-4045          | S          | 113 | Heihe21           | S          |
| 29  | Qihuang42          | S          | 114 | Heihe23           | S          |
| 30  | Z13-631-2          | S          | 115 | Jihuang138        | S          |
| 31  | Ls15               | S          | 116 | He00-23           | S          |
| 32  | Z13-631-7          | S          | 117 | Heihe24           | S          |
| 33  | Dongda2            | S          | 118 | Jinpin42          | S          |
| 34  | Ls18               | S          | 119 | Jim               | S          |
| 35  | HLT8               | S          | 120 | Tianlong1         | S          |
| 36  | KeC14-732          | S          | 121 | Hefeng26          | S          |

|    |                           |   |     |                       |   |
|----|---------------------------|---|-----|-----------------------|---|
| 37 | Fengshou25                | S | 122 | Changnong17           | S |
| 38 | Чернивецъка9              | S | 123 | Jinong18              | S |
| 39 | Gaillard                  | S | 124 | Hefeng35              | S |
| 40 | Kenfeng7                  | S | 125 | Heihe13               | S |
| 41 | Suinong18                 | S | 126 | Heihe44               | S |
| 42 | Kennong19                 | S | 127 | Jilin30               | S |
| 43 | Hefeng40                  | S | 128 | Suinong28             | S |
| 44 | Suinong14                 | S | 129 | Shennen               | S |
| 45 | Jiufeng10                 | S | 130 | Beidou43              | S |
| 46 | Локъс                     | S | 131 | Beian1                | S |
| 47 | Nenfeng20                 | S | 132 | Beidou36              | S |
| 48 | Fengshou27                | S | 133 | Hedou6                | S |
| 49 | Dongnong76                | S | 134 | Jianong1              | S |
| 50 | Xingnong12                | S | 135 | Shengdou48            | S |
| 51 | Longqingdou2              | S | 136 | Suinong44             | S |
| 52 | H10-2430                  | S | 137 | Suinong27             | S |
| 53 | Suinong68                 | S | 138 | Suinong29             | S |
| 54 | Mushi9                    | S | 139 | Suinong50             | S |
| 55 | Gongye04L-141             | S | 140 | 777                   | S |
| 56 | Suinong69                 | S | 141 | Suinong41             | S |
| 57 | Dongsheng3                | S | 142 | Huangjinyuan          | S |
| 58 | Nong75                    | S | 143 | Tiejiazi              | S |
| 59 | Dongsheng92               | S | 144 | Niumaohuang           | S |
| 60 | Longken381                | S | 145 | Heinong44             | S |
| 61 | Suinong67                 | S | 146 | Heihe50               | S |
| 62 | Beijiang91                | S | 147 | Longken332            | S |
| 63 | Bindou10                  | S | 148 | LG2016-2              | S |
| 64 | Sui07-1077                | S | 149 | No.16                 | S |
| 65 | Ken05-3762                | S | 150 | Heijiao1-1161         | S |
| 66 | Ha06-3869                 | S | 151 | Heihe53               | S |
| 67 | Ha05-7778                 | S | 152 | NT04                  | S |
| 68 | Chohckuzan                | S | 153 | Boige dulotet geronne | S |
| 69 | Wangkuilianhua black bean | S | 154 | Fendou78              | S |
| 70 | Harwood                   | S | 155 | Heijinyuan            | S |
| 71 | Saikai20                  | S | 156 | Ke732                 | S |
| 72 | Xiaobaiqi                 | S | 157 | Tiejiasilihuang       | S |
| 73 | Dalihuang                 | S | 158 | Heifu03-56            | S |
| 74 | Yongfengdou               | S | 159 | Hefeng25              | S |

|    |                           |   |     |                             |   |
|----|---------------------------|---|-----|-----------------------------|---|
| 75 | Nongan sauce colored bean | S | 160 | Yapoche                     | S |
| 76 | Heihe6                    | S | 161 | H39                         | S |
| 77 | Hefeng29                  | S | 162 | Suinong36                   | S |
| 78 | Heinong37                 | S | 163 | Suinong10                   | S |
| 79 | Hongfeng11                | S | 164 | Jiyu67                      | S |
| 80 | Beijiang1                 | S | 165 | L67-166                     | S |
| 81 | Kennong18                 | S | 166 | Small seeded fodder soybean | S |
| 82 | L65-1274                  | S | 167 | Heihe18                     | S |
| 83 | Heihe35                   | S | 168 | Hefeng44                    | S |
| 84 | Heihe39                   | S | 169 | L85-144                     | S |
| 85 | Heihe41                   | S |     |                             |   |

---

HR stands for highly resistant, MR stands for moderately resistant, R stands for resistant, S stands for susceptible, and HS stands for highly susceptible.

**Supplementary Table S2** The number of SNPs on each chromosome.

| Chromosome | Number of SNPs | Chromosome coverage<br>length(bp) | Average<br>distance(bp) |
|------------|----------------|-----------------------------------|-------------------------|
| Chr01      | 1,775          | 56,830,090                        | 30,217                  |
| Chr02      | 2,288          | 48,570,165                        | 21,228                  |
| Chr03      | 2,117          | 45,721,970                        | 21,597                  |
| Chr04      | 4,044          | 52,285,568                        | 12,929                  |
| Chr05      | 961            | 42,116,119                        | 43,825                  |
| Chr06      | 2,744          | 51,315,427                        | 18,701                  |
| Chr07      | 1,963          | 44,602,314                        | 22,722                  |
| Chr08      | 1,811          | 47,794,740                        | 26,391                  |
| Chr09      | 2,871          | 50,177,462                        | 17,477                  |
| Chr10      | 2,438          | 51,553,957                        | 21,146                  |
| Chr11      | 664            | 34,728,097                        | 52,301                  |
| Chr12      | 1,194          | 40,085,315                        | 33,572                  |
| Chr13      | 1,923          | 45,507,570                        | 23,664                  |
| Chr14      | 1,683          | 48,932,740                        | 29,074                  |
| Chr15      | 3,869          | 51,751,663                        | 13,375                  |
| Chr16      | 2,643          | 37,795,888                        | 14,300                  |
| Chr17      | 2,781          | 41,577,348                        | 14,950                  |
| Chr18      | 3,547          | 58,015,888                        | 16,359                  |
| Chr19      | 3,298          | 50,675,996                        | 15,365                  |
| Chr20      | 2,122          | 47,896,123                        | 22,571                  |
| Total      | 52,357         | 947,934,440                       | 18,105                  |

**Supplementary Table S3** Information of candidate genes.

| Chromosome | Gene            | Physical position     | PFAM                               | KOG                                                       | KEGG     | GO                                                                                                              | Function prediction                            |
|------------|-----------------|-----------------------|------------------------------------|-----------------------------------------------------------|----------|-----------------------------------------------------------------------------------------------------------------|------------------------------------------------|
| 6          | Glyma.06G023900 | Chr06:1789190-1792812 | Thaumat                            |                                                           |          |                                                                                                                 | Soybean thaumatin-like protein                 |
| 6          | Glyma.06G024000 | Chr06:1800213-1805307 |                                    |                                                           |          |                                                                                                                 | Soybean PSK SIMULATOR 2                        |
| 6          | Glyma.06G024100 | Chr06:1806833-1810627 | Tubulin.                           |                                                           | Tubulin. | Microtubule formation, cytoskeletal components, GTPase activity, protein complexes, and GTP-binding proteins.   | Soybean tubulin $\beta$ chain.                 |
| 6          | Glyma.06G024200 | Chr06:1814632-1815829 |                                    |                                                           |          |                                                                                                                 | Growth-promoting plant hormones                |
| 6          | Glyma.06G024300 | Chr06:1820185-1822892 |                                    |                                                           |          |                                                                                                                 | Soybean transcription initiation factor.       |
| 6          | Glyma.06G024400 | Chr06:1825939-1831404 | Protein retention in the ER lumen. | Endoplasmic reticulum luminal protein-retaining receptor. |          | Endoplasmic reticulum retains sequence binding, membrane components, and protein retention within the ER lumen. | Soybean ER luminal protein-retaining receptor. |
| 6          | Glyma.06G024500 | Chr06:1833924-1835173 |                                    |                                                           |          |                                                                                                                 | Soybean gibberellin-regulated protein.         |
| 6          | Glyma.06G024600 | Chr06:1839001-1843501 |                                    |                                                           |          |                                                                                                                 | Soybean transcript variants                    |

|   |                 |                       |                        |                                                 |             |                                                                                                                        |                                                                        |
|---|-----------------|-----------------------|------------------------|-------------------------------------------------|-------------|------------------------------------------------------------------------------------------------------------------------|------------------------------------------------------------------------|
| 6 | Glyma.06G024700 | Chr06:1844482-1850566 |                        |                                                 |             |                                                                                                                        | Soybean WEB family members                                             |
| 6 | Glyma.06G024800 | Chr06:1855001-1855606 |                        |                                                 |             |                                                                                                                        |                                                                        |
| 6 | Glyma.06G024900 | Chr06:1863007-1866952 | E2F_TDP                | Transcription factor E2F/dimeric complex (TDP). | E2F3        | Endoplasmic reticulum luminal proteins retain receptor, transcription factor activities, sequence-specific DNA binding | Soybean transcription factor E2FC                                      |
| 6 | Glyma.06G025000 | Chr06:1870106-1873596 | TB2_DP1_HVA22          | HVA22/DP1 gene product-related protein.         | REEP1_2_3_4 |                                                                                                                        | HVA22 protein                                                          |
| 6 | Glyma.06G025100 | Chr06:1878566-1884488 | Glyco_hydro_9          |                                                 |             | Hydrolase activity, hydrolysis of ortho-glycosyl compounds, carbohydrate metabolism process, catalytic activity        |                                                                        |
| 6 | Glyma.06G025200 | Chr06:1888157-1891061 | Lysine decarboxylation |                                                 |             |                                                                                                                        | Soybean cytokinin nucleoside 5'-monophosphate phosphoribosyl hydrolase |
| 6 | Glyma.06G025300 | Chr06:1920734-1921556 | Auxin induction        |                                                 |             | Auxin-response                                                                                                         | Soybean auxin-responsive protein                                       |
| 6 | Glyma.06G025400 | Chr06:1933299-1939199 |                        |                                                 |             |                                                                                                                        | Soybean filamentous vegetable protein                                  |

|   |                 |                       |                   |                                                              |                 |                                         |
|---|-----------------|-----------------------|-------------------|--------------------------------------------------------------|-----------------|-----------------------------------------|
| 6 | Glyma.06G025500 | Chr06:1948589-1948952 | Auxin induction   |                                                              | Auxin-response  |                                         |
| 6 | Glyma.06G025600 | Chr06:1958596-1960432 | MRP_L53           | MRPL53                                                       |                 | Soybean zinc-finger CCCH domain protein |
| 6 | Glyma.06G025700 | Chr06:1962629-1967722 | Metal ion binding |                                                              |                 |                                         |
| 6 | Glyma.06G025800 | Chr06:1968736-1974567 |                   |                                                              | Protein binding | Soybean Protein IQ-domain               |
| 6 | Glyma.06G025900 | Chr06:1983752-1991705 | RCC1              |                                                              |                 | Soybean protein RCC                     |
| 6 | Glyma.06G026000 | Chr06:1998850-2002573 |                   |                                                              |                 | Soybean bZIP transcription factor       |
| 6 | Glyma.06G026100 | Chr06:2006495-2011301 | GAGA_bind         |                                                              |                 | Soybean protein basic pentacysteine6    |
| 6 | Glyma.06G026200 | Chr06:2015705-2017331 | Glyoxal oxidation |                                                              |                 | Soybean aldehyde oxidase GLOX1          |
| 6 | Glyma.06G026300 | Chr06:2025052-2027273 | Glyoxal oxidation |                                                              |                 | Soybean aldehyde oxidase GLOX1          |
| 6 | Glyma.06G026400 | Chr06:2035019-2042075 | WD40              | G protein $\beta$ -like protein GNB1L, containing WD repeats | Protein binding |                                         |

|   |                 |                       |                                         |                                  |                                |                                                                                                                     |                                                       |
|---|-----------------|-----------------------|-----------------------------------------|----------------------------------|--------------------------------|---------------------------------------------------------------------------------------------------------------------|-------------------------------------------------------|
| 6 | Glyma.06G026500 | Chr06:2043193-2046391 | Antibody hydrolase 1                    |                                  |                                |                                                                                                                     | 1-acylglycerol-3-phosphate O-acyltransferase          |
| 6 | Glyma.06G026600 | Chr06:2050651-2054875 | LRR_8, LRR_1, tyrosine kinase, LRRNT_2. | Serine/threonine protein kinase. |                                | Protein tyrosine kinase activity, protein binding, ADP binding, protein kinase activity and protein phosphorylation | LRR receptor-like serine/threonine protein kinase.    |
| 6 | Glyma.06G026700 | Chr06:2061354-2067402 | Kinesin                                 | Kinesin-like protein.            |                                | Microtubule-based movement, ATP binding, microtubule movement, microscopic binding, kinesin complex                 | Kinesin                                               |
| 6 | Glyma.06G026800 | Chr06:2072074-2077074 | DUF726                                  |                                  |                                |                                                                                                                     | Soybean transmembrane and coiled-coil domain proteins |
| 6 | Glyma.06G026900 | Chr06:2080251-2080822 |                                         |                                  |                                |                                                                                                                     | Glycine-rich RNA binding protein GRP1A.               |
| 6 | Glyma.06G027000 | Chr06:2087091-2088456 | ZF-B box                                |                                  |                                | Zinc ion binding                                                                                                    | Soy B-box zinc-finger protein 21                      |
| 6 | Glyma.06G027100 | Chr06:2095425-2101740 | FHA、MCRS_N                              |                                  | MCRS1, INO80Q                  | Protein binding                                                                                                     |                                                       |
| 6 | Glyma.06G027200 | Chr06:2104471-2108449 | K-box                                   | MADS box transcription factors   | MADS-box transcription factors | Nucleus, ADP binding, transcriptional regulation, DNA templating, transcription factor                              | Soybean flower homologous protein                     |

|   |                 |                       |              |                                                                      |                |                                                                                                                                                                 |                                                  |
|---|-----------------|-----------------------|--------------|----------------------------------------------------------------------|----------------|-----------------------------------------------------------------------------------------------------------------------------------------------------------------|--------------------------------------------------|
|   |                 |                       |              |                                                                      |                | activity, sequence-specific DNA binding, protein dimerization activity                                                                                          |                                                  |
| 6 | Glyma.06G027300 | Chr06:2111882-2113374 |              | Serine/threonine-specific protein phosphatase PP1, catalytic subunit | PPP1C          | Hydrolase activity.                                                                                                                                             | Soybean serine/threonine protein phosphatase PP1 |
| 6 | Glyma.06G027400 | Chr06:2118849-2122155 | SLAC1        |                                                                      |                | Transmembrane transport, anion channel activity, components of membranes, and cellular ion homeostasis                                                          | Soybean S-type anion channel SLAH1-like          |
| 6 | Glyma.06G027500 | Chr06:2135506-2138166 | DUF702       |                                                                      |                |                                                                                                                                                                 |                                                  |
| 6 | Glyma.06G027600 | Chr06:2147624-2156592 | V-atpase I   |                                                                      | Atpev0a, ATP6N | Proton transport V-type atpase, vacuolar proton transport v-type atpase, ATP hydrolysis coupled proton transport, hydrogen ion transmembrane transport activity | V-type proton atpase subunit A3                  |
| 6 | Glyma.06G027700 | Chr06:2155899-2157973 | Peptidase C1 |                                                                      | CTSF           | Cysteine-type peptidase and proteolysis activity                                                                                                                | Soybean cysteine protease                        |
| 6 | Glyma.06G027800 | Chr06:2158063-2158495 |              |                                                                      |                |                                                                                                                                                                 |                                                  |

|   |                 |                       |                       |                                |                         |                                                                                                                          |                                                     |
|---|-----------------|-----------------------|-----------------------|--------------------------------|-------------------------|--------------------------------------------------------------------------------------------------------------------------|-----------------------------------------------------|
| 6 | Glyma.06G027900 | Chr06:2158116-2168073 | TFIIF $\beta$         | TFIIF                          | TFIIF2, GTF2F2 and TFG2 | TFIIF complex, regulation of the transcription initiation and the transcription from the RNA polymerase II promoter      | Soybean TFIIF $\beta$                               |
| 6 | Glyma.06G028000 | Chr06:2183635-2186994 | EamA                  |                                |                         | Membrane components and transmembrane transporter activity                                                               | Walls Are Thin 1                                    |
| 6 | Glyma.06G028100 | Chr06:2193291-2197224 | Phosphorus            | Purple acid phosphatase        |                         | Metal ion binding activity                                                                                               | Soybean purple acid phosphatase                     |
| 6 | Glyma.06G028200 | Chr06:2196937-2202255 | Phosphorus            | Purple acid phosphatase        |                         | Hydrolase activity, acid phosphatase activity, metal ion binding and protein binding activity                            | Soybean purple acid phosphatase                     |
| 6 | Glyma.06G028300 | Chr06:2204385-2205713 | AP2                   |                                |                         | Protein binding, transcription factor activity and transcriptional regulation                                            | Dehydration response element binding protein (DREB) |
| 6 | Glyma.06G028400 | Chr06:2209305-2212594 | CLTH                  | LisH motif-containing proteins |                         | Protein binding activity                                                                                                 | Glucose-Induced Degradation (GID) 8- homologues     |
| 6 | Glyma.06G028500 | Chr06:2217380-2218232 | LON_substr_bdg domain |                                |                         | Proteolysis and ATP-dependent peptidase activity                                                                         | Soybean protease                                    |
| 6 | Glyma.06G028600 | Chr06:2220716-2222691 | Thioredoxin 9         | Thioredoxin                    | trxA                    | Protein disulfide oxidoreductase activity, regulation of glyceryl ether metabolic process and cellular redox homeostasis | Soybean H-type thioredoxin                          |

|    |                 |                         |                        |           |  |                                                                                                                                                           |                                                                      |
|----|-----------------|-------------------------|------------------------|-----------|--|-----------------------------------------------------------------------------------------------------------------------------------------------------------|----------------------------------------------------------------------|
| 6  | Glyma.06G028700 | Chr06:2223508-2228008   | Glyco_hydro_35         |           |  | Hydrolase activity and regulation of carbohydrate metabolism process                                                                                      |                                                                      |
| 6  | Glyma.06G028800 | Chr06:2237125-2239413   |                        |           |  | Regulation of the fructose-2,6-bisphosphate (F-2,6-P2) metabolism, ADP binding and catalytic activity.                                                    | Soybean 6-phosphofructo-2-kinase/fructose-2,6-bisphosphatase (PFKFB) |
| 6  | Glyma.06G028900 | Chr06:2262637-2269457   | Cytokine binding       | CKX       |  | Oxidoreductase, cytokinin dehydrogenase, flavin adenine dinucleotide binding and catalytic activity; Regulation of cytokinin metabolic and redox process. | Soybean cytokinin dehydrogenase                                      |
| 12 | Glyma.12G129800 | Chr12:14477191-14482275 | Trehalose PPase domain | TPS       |  | Catalytic activity, regulation of trehalose biosynthesis and metabolic process                                                                            | $\alpha,\alpha$ -trehalose-phosphate synthase                        |
| 12 | Glyma.12G129900 | Chr12:14527787-14529198 |                        |           |  |                                                                                                                                                           |                                                                      |
| 12 | Glyma.12G130000 | Chr12:14537934-14543293 | Fer4_13 domain         | Chaperone |  |                                                                                                                                                           | Soybean chaperone protein                                            |
| 12 | Glyma.12G130100 | Chr12:14607193-14607463 | zf-RVT                 |           |  |                                                                                                                                                           |                                                                      |
| 12 | Glyma.12G130200 | Chr12:14610786-14613900 | Glyco_hydro_1          |           |  | Hydrolase activity and regulation of carbohydrate metabolism process                                                                                      | Soybean $\beta$ -glucosidase containing cyanogen                     |

|    |                 |                         |                                       |                               |                                                  |                                               |
|----|-----------------|-------------------------|---------------------------------------|-------------------------------|--------------------------------------------------|-----------------------------------------------|
| 12 | Glyma.12G130300 | Chr12:14632936-14634415 | Inhibitor and Peptidase C1            | Cysteine protease cathepsin L | Cysteine-type peptidase activity and proteolysis | Soybean senescence-specific cysteine protease |
| 12 | Glyma.12G130400 | Chr12:14657765-14658290 |                                       |                               |                                                  |                                               |
| 12 | Glyma.12G130500 | Chr12:14689230-14690546 | Inhibitor I29 domain and Peptidase C1 |                               | Cysteine-type peptidase activity and proteolysis |                                               |
| 12 | Glyma.12G130600 | Chr12:14736643-14737771 | Inhibitor I29 domain and Peptidase C1 |                               | Cysteine-type peptidase activity and proteolysis |                                               |
| 12 | Glyma.12G130700 | Chr12:14739201-14740428 | Inhibitor I29 domain and Peptidase C1 |                               | Cysteine-type peptidase activity and proteolysis |                                               |
| 12 | Glyma.12G130800 | Chr12:14757062-14757409 | Cyt-b5                                | PGRMC1/2                      |                                                  | Soybean sterol binding protein                |
| 12 | Glyma.12G130900 | Chr12:14765066-14765526 |                                       |                               |                                                  | Soybean glucuronosyltransferase               |
| 12 | Glyma.12G131000 | Chr12:14768538-14773465 | Inhibitor I29 domain and Peptidase C1 |                               | Cysteine-type peptidase activity and proteolysis |                                               |
| 12 | Glyma.12G131100 | Chr12:14813703-14814828 | Inhibitor I29 domain and Peptidase C1 |                               | Cysteine-type peptidase activity and proteolysis |                                               |
| 12 | Glyma.12G131200 | Chr12:14816479-14817981 | Inhibitor I29 domain and Peptidase C1 |                               | Cysteine-type peptidase activity and proteolysis | Soybean senescence-specific cysteine protease |

|    |                 |                         |                                       |                               |                |                                                                   |                                                                  |
|----|-----------------|-------------------------|---------------------------------------|-------------------------------|----------------|-------------------------------------------------------------------|------------------------------------------------------------------|
| 12 | Glyma.12G131300 | Chr12:14837986-14839212 | Inhibitor I29 domain and Peptidase C1 |                               |                | Cysteine-type peptidase activity and proteolysis                  | Soybean vatamin-B                                                |
| 12 | Glyma.12G131400 | Chr12:14854898-14856124 | Inhibitor I29 domain and Peptidase C1 |                               |                | Cysteine-type peptidase activity and proteolysis                  | Soybean vatamin-B                                                |
| 12 | Glyma.12G131500 | Chr12:14878261-14879650 | Inhibitor I29 domain and Peptidase C1 | Cysteine protease cathepsin L | CEP, CYSEP     | Cysteine-type peptidase activity and proteolysis                  | Soybean vatamin-B                                                |
| 12 | Glyma.12G131600 | Chr12:14881257-14883462 | Ribosome L5                           | 60S ribosomal protein L11     | RP-L11e, RPL11 | Structural components of ribosomes and involvement in translation | Soybean 60S ribosomal protein                                    |
| 12 | Glyma.12G131700 | Chr12:14888564-14890785 | Ribosome L5                           | 60S ribosomal protein L11     | RP-L11e, RPL11 | Structural components of ribosomes and involvement in translation | Soybean 60S ribosomal protein L11 (LOC100818410), mRNA           |
| 12 | Glyma.12G131800 | Chr12:14895223-14897184 |                                       | Predicted E3 ubiquitin ligase |                | Zinc ion and protein binding                                      | Soybean E3 ubiquitin protein ligase                              |
| 12 | Glyma.12G131900 | Chr12:14915662-14919704 |                                       |                               |                |                                                                   | <i>Glycine soja</i> TMV resistance protein N-like (LOC114378377) |
| 12 | Glyma.12G132000 | Chr12:14917753-14921517 | LRR_8, NB-ARC, TIR_2 and LRR_3        | Adenosine triphosphatase      |                | Signaling transduction, ATP and protein binding                   | Soybean antiviral gene, <i>GmRUN1</i>                            |
| 12 | Glyma.12G132100 | Chr12:14924075-14925623 |                                       |                               |                |                                                                   |                                                                  |
| 12 | Glyma.12G132200 | Chr12:14934826-14945703 | TIR_2, NB-ARC, And LRR_3              |                               |                | Signaling transduction, ATP and protein binding                   | Soybean antiviral gene, <i>GmRUN1</i>                            |

---

**Supplementary Table S4** The SNP haplotypes of *Glyma.12G132000*.

| Haplotype      | Gm12_Hap2a                                 | Gm12_Hap3a                   | Gm12_Hap5a                   |
|----------------|--------------------------------------------|------------------------------|------------------------------|
| 14917777       | A                                          | G                            | G                            |
| 14917855       | A                                          | G                            | G                            |
| 14917897       | C                                          | G                            | G                            |
| 14917955       | A                                          | T                            | T                            |
| 14918050       | A                                          | G                            | G                            |
| 14918052       | T                                          | T                            | C                            |
| 14918058       | G                                          | G                            | C                            |
| 14918059       | T                                          | T                            | C                            |
| 14918060       | T                                          | C                            | C                            |
| 14918061       | T                                          | A                            | A                            |
| 14918078       | A                                          | A                            | C                            |
| 14918091       | T                                          | T                            | C                            |
| 14918103       | G                                          | G                            | T                            |
| 14918104       | G                                          | G                            | C                            |
| Frequency      | 75.74%                                     | 7.69%                        | 5.33%                        |
| Disease in dex | 52.17                                      | 49.50                        | 48.48                        |
| Significance   | Gm12_Hap3a and Gm12_Hap5a: no significance | Gm12_Hap2a and Gm12_Hap3a: * | Gm12_Hap2a and Gm12_Hap5a: * |

Statistical analyses were performed using SPSS 20.0 software; \* represent  $p < 0.05$ .

**Supplementary Table S5** The SNP haplotypes of *Glyma.12G132200*.

| Haplotype     | Gm12_Hap2b                                    | Gm12_Hap3b                                    | Gm12_Hap8b                                    |
|---------------|-----------------------------------------------|-----------------------------------------------|-----------------------------------------------|
| 14935130      | A                                             | A                                             | T                                             |
| 14935243      | G                                             | G                                             | A                                             |
| 14935273      | G                                             | T                                             | G                                             |
| 14935288      | G                                             | G                                             | A                                             |
| 14935327      | T                                             | T                                             | C                                             |
| 14935339      | T                                             | T                                             | C                                             |
| 14935343      | A                                             | A                                             | G                                             |
| 14935348      | A                                             | A                                             | T                                             |
| 14935349      | C                                             | C                                             | T                                             |
| Frequency     | 60.36%                                        | 12.43%                                        | 5.92%                                         |
| Disease index | 49.76                                         | 48.87                                         | 49.93                                         |
| Significance  | Gm12_Hap2b and Gm12_Hap3b:<br>no significance | Gm12_Hap2b and Gm12_Hap8b:<br>no significance | Gm12_Hap3b and Gm12_Hap8b:<br>no significance |

Statistical analyses were performed using SPSS 20.0 software.

**Supplementary Table S6** The SNP haplotype of *Glyma.06G02660*.

| Haplotype     | Gm6_Hap1                     | Gm6_Hap2                     | Gm6_Hap6                                     |
|---------------|------------------------------|------------------------------|----------------------------------------------|
| 2051124       | C                            | C                            | T                                            |
| 2053363       | C                            | G                            | C                                            |
| Frequency     | 64.50%                       | 6.51%                        | 5.92%                                        |
| Disease index | 52.30                        | 49.58                        | 48.56                                        |
| Significance  | Gm6_Hap1<br>and Gm6_Hap2: ** | Gm6_Hap1<br>and Gm6_Hap6: ** | Gm6_Hap2<br>and Gm6_Hap6:<br>no significance |

Statistical analyses were performed using SPSS 20.0 software; \*\* represent  $p < 0.01$ .
